# Supplementary material
Source: PubMed Central journal article supplement (PMC3302320)
Supplement: supp_86.6.3393_FigS1.pdf [file supp_86.6.3393_FigS1.pdf]

Sensitive Viruses

| Virus             | Clade | IC50   |        |        |         | IC80   |        |        |        |
|-------------------|-------|--------|--------|--------|---------|--------|--------|--------|--------|
|                   |       | VRC01  | VRC01  | PG9    | PG16    | VRC01  | VRC01  | PG9    | PG16   |
| 0260.v5.c36       | A     | 0.529  | 0.618  | 2.180  | 2.100   | 1.480  | 1.750  | 22.800 | >50    |
| 0330.v4.c3        | A     | 0.064  | 0.132  | 0.018  | 0.008   | 0.231  | 0.543  | 0.083  | 0.027  |
| 3415.v1.c1        | A     | 0.092  | 0.108  | 0.149  | 0.036   | 0.266  | 0.310  | 0.770  | 0.342  |
| BB201.B42         | A     | 0.343  | 0.157  | 0.014  | 0.003   | 1.110  | 0.488  | 0.046  | 0.008  |
| BB539.2B13        | A     | 0.094  | 1.470  | 0.106  | 0.012   | 0.330  | 16.900 | 0.422  | 0.062  |
| B1369.9A          | A     | 0.149  | 0.052  | 0.029  | 0.007   | 0.657  | 0.294  | 0.151  | 0.037  |
| B5208.B1          | A     | 0.029  | 0.027  | 0.031  | 0.004   | 0.104  | 0.098  | 0.099  | 0.018  |
| KER2008.12        | A     | 0.563  | 0.323  | 0.017  | 0.006   | 1.740  | 1.350  | 0.085  | 0.046  |
| KER2018.11        | A     | 0.070  | 0.167  | 0.001  | <0.0006 | 0.397  | 0.541  | 0.004  | 0.002  |
| KNH1209.18        | A     | 0.087  | 0.080  | 0.367  | 0.678   | 0.299  | 0.310  | >50    | >50    |
| MB201.A1          | A     | 0.237  | 0.034  | 0.024  | 0.001   | 0.478  | 0.214  | 0.193  | 0.019  |
| MB201.B10         | A     | 0.132  | 0.042  | 0.052  | 0.020   | 0.538  | 0.042  | 0.218  | 0.125  |
| MB539.2B7         | A     | 0.544  | 0.304  | 0.058  | 0.025   | 1.480  | 0.956  | 0.383  | 0.205  |
| MB539.2D1         | A     | 0.060  | 0.499  | 0.035  | 0.009   | 0.480  | 0.499  | 0.122  | 0.030  |
| MI369.A5          | A     | 0.162  | 0.072  | 0.058  | 0.011   | 0.769  | 0.331  | 0.364  | 0.082  |
| MS208.A1          | A     | 0.147  | 0.131  | 0.071  | 0.047   | 0.668  | 0.455  | 0.589  | 31.800 |
| MS208.A3          | A     | 0.050  | 0.022  | 0.025  | 0.006   | 0.192  | 0.022  | 0.086  | 0.020  |
| Q168.a2           | A     | 0.140  | 0.059  | 0.106  | 0.031   | 0.374  | 0.225  | 0.342  | 0.106  |
| Q23.17            | A     | 0.086  | 0.050  | 0.007  | 0.002   | 0.252  | 0.145  | 0.020  | 0.004  |
| Q259.w6           | A     | 0.170  | 0.028  | 1.170  | 2.580   | 0.543  | 0.028  | >50    | >50    |
| Q461.e2           | A     | 0.410  | 0.390  | 3.010  | 4.110   | 1.310  | 1.140  | 29.900 | >50    |
| Q769.d22          | A     | 0.015  | 0.030  | 0.007  | 0.010   | 0.074  | 0.148  | 0.033  | 11.000 |
| Q769.h5           | A     | 0.014  | 0.007  | 0.002  | 0.002   | 0.070  | 0.060  | 0.007  | 0.020  |
| Q842.d12          | A     | 0.006  | 0.004  | 0.005  | 0.001   | 0.020  | 0.023  | 0.021  | 0.006  |
| RW020.2           | A     | 0.303  | 0.100  | 0.103  | 0.070   | 0.868  | 0.350  | 0.622  | 3.510  |
| UG037.8           | A     | 0.035  | 0.050  | 0.021  | 0.001   | 0.130  | 0.104  | 0.065  | 0.004  |
| 3301.V1.C24       | AC    | 0.084  | 0.038  | 0.281  | 0.020   | 0.188  | 0.099  | 1.510  | 0.307  |
| 6041.v3.c23       | AC    | <0.023 | nd     | 0.244  | 0.048   | 0.080  | nd     | 3.639  | 0.256  |
| 3103.v3.c10       | ACD   | 0.930  | nd     | 28.004 | 25.391  | 2.490  | nd     | >50    | >50    |
| 6095.V1.C10       | ACD   | 0.464  | 0.781  | 0.242  | <0.023  | 1.500  | 2.530  | 2.250  | 0.443  |
| 3468.V1.C12       | AD    | 0.040  | 0.057  | 2.090  | 2.380   | 0.121  | 0.247  | >50    | >50    |
| C1080.c3          | AE    | 1.500  | 1.540  | 0.004  | 0.001   | 9.330  | 21.300 | 0.011  | 0.004  |
| C2101.c1          | AE    | 0.097  | 0.216  | 0.026  | 0.009   | 0.558  | 1.980  | 0.289  | 0.069  |
| C4118.09          | AE    | 0.110  | 0.092  | 0.037  | 0.021   | 0.574  | 0.699  | 0.205  | 0.240  |
| CNE5              | AE    | 0.228  | 0.273  | 0.018  | 0.008   | 0.788  | 1.240  | 0.051  | 0.033  |
| CNE55             | AE    | 0.292  | 0.105  | 0.146  | 1.370   | 0.891  | 0.327  | 1.320  | >50    |
| CNE59             | AE    | 0.516  | 0.457  | 0.091  | 0.113   | 1.680  | 1.860  | 0.465  | >50    |
| M02138            | AE    | 0.742  | 0.129  | 0.122  | 0.022   | 1.850  | 1.080  | 1.360  | 0.810  |
| R1166.c1          | AE    | 1.774  | 1.051  | 1.550  | 0.587   | 7.053  | 5.358  | 9.238  | 12.502 |
| R2184.c4          | AE    | 0.052  | 0.023  | 0.204  | 0.280   | 0.237  | 0.117  | 1.750  | >50    |
| R3265.c6          | AE    | 0.731  | 1.680  | 1.300  | 0.036   | 4.280  | >50    | 9.800  | 0.681  |
| TH966.8           | AE    | 0.331  | 0.263  | 0.042  | 0.008   | 1.240  | 0.958  | 0.183  | 0.030  |
| 211-9             | AG    | 14.280 | nd     | 0.049  | 0.029   | >50    | nd     | 0.243  | 0.144  |
| 235-47            | AG    | 0.049  | <0.023 | 0.322  | 0.246   | 0.139  | 0.048  | 1.080  | 3.490  |
| 255-34            | AG    | 0.252  | 0.383  | 0.015  | 0.005   | 0.978  | 3.900  | 0.114  | 0.079  |
| 257-31            | AG    | 1.677  | 0.550  | 0.029  | 0.003   | 5.799  | 2.843  | 0.076  | 0.024  |
| 263-8             | AG    | 0.119  | 0.097  | 0.353  | 1.310   | 0.573  | 0.297  | 1.460  | >50    |
| 271-11            | AG    | 0.052  | 0.078  | 0.097  | 0.102   | 0.200  | 0.431  | 1.414  | >50    |
| 280-5             | AG    | 0.017  | 0.036  | 0.379  | 0.233   | 0.081  | 0.217  | 1.944  | 4.527  |
| 928-28            | AG    | 0.378  | 7.930  | 0.060  | 0.023   | 0.960  | >50    | 0.301  | 0.249  |
| DJ263.8           | AG    | 0.072  | 0.305  | 0.100  | 0.048   | 0.668  | 5.390  | 0.733  | 1.110  |
| T253-11           | AG    | 0.265  | 0.074  | 0.127  | 4.440   | 0.772  | 0.248  | 1.720  | >50    |
| T33-7             | AG    | <0.023 | <0.023 | <0.023 | <0.023  | <0.023 | <0.023 | 0.087  | 0.279  |
| 3988.25           | B     | 2.100  | 0.250  | 0.010  | 0.002   | >50    | 1.730  | 0.091  | 0.080  |
| 5768.04           | B     | 0.099  | 0.141  | 0.073  | 0.020   | 0.942  | 0.825  | 1.320  | >50    |
| 1012-11.TC21.3257 | B     | 0.120  | nd     | 0.172  | 0.030   | 0.320  | nd     | 0.605  | 0.219  |
| 1056-10.TA11.1826 | B     | 0.920  | nd     | 6.339  | 0.315   | 3.280  | nd     | 38.259 | 1.952  |
| ADA.DG            | B     | 0.424  | 0.412  | 0.342  | 0.023   | 1.400  | 1.350  | >50    | 0.458  |
| Bal.01            | B     | 0.102  | 0.116  | 0.052  | 8.000   | 0.318  | 0.601  | 1.520  | >50    |
| Bal.26            | B     | 0.047  | 0.503  | 0.034  | 0.136   | 0.154  | 5.330  | 0.365  | >50    |
| BX08.16           | B     | 0.281  | 0.363  | 0.024  | 0.062   | 0.680  | 1.260  | 0.273  | 38.800 |
| CAAN.A2           | B     | 1.060  | 1.660  | 13.000 | 7.430   | 2.630  | 4.550  | >50    | >50    |
| CNE10             | B     | 0.776  | 0.619  | 0.243  | 9.170   | 1.870  | 1.900  | 1.610  | >50    |
| HT593.1           | B     | 0.438  | 0.130  | 0.271  | 0.153   | 1.720  | 1.010  | 5.410  | 13.700 |
| JRC5F.JB          | B     | 0.234  | 0.162  | 0.903  | 0.002   | 0.804  | 0.950  | 0.009  | 0.016  |
| PVO.04            | B     | 0.398  | 0.283  | 6.240  | 19.800  | 0.990  | 0.995  | 37.100 | >50    |
| RELIO.67          | B     | 0.045  | 0.029  | 0.005  | 0.005   | 0.207  | 0.140  | 0.090  | 0.049  |
| SC05.8C11.2344    | B     | 0.640  | nd     | 0.892  | 0.070   | 1.910  | nd     | 4.283  | 1.616  |
| SC422.8           | B     | 0.132  | 0.052  | 0.535  | 1.200   | 0.331  | 0.207  | 38.600 | >50    |
| SS1196.01         | B     | 0.276  | 0.138  | 0.293  | 0.069   | 0.650  | 0.356  | 3.080  | 2.900  |
| TRJO.58           | B     | 0.079  | 0.183  | 0.246  | 0.393   | 0.239  | 0.138  | 3.220  | 13.900 |
| TRO.11            | B     | 0.343  | 0.237  | 41.500 | 4.860   | 1.090  | 0.926  | >50    | >50    |
| WITO.33           | B     | 0.112  | 0.400  | <0.023 | <0.023  | 0.267  | 15.000 | 0.030  | 0.006  |
| YU2.DG            | B     | 0.055  | 0.063  | 3.690  | 0.041   | 0.149  | 0.193  | >50    | >50    |
| CH038.12          | BC    | 0.379  | 0.187  | 0.500  | 49.000  | 1.530  | 0.616  | >50    | >50    |
| CH070.1           | BC    | 18.700 | 0.108  | 0.006  | 0.002   | >50    | 1.390  | 0.024  | 0.013  |
| CH117.4           | BC    | 0.059  | 0.040  | 0.008  | 0.005   | 0.334  | 0.252  | 0.030  | 0.028  |
| CH181.12          | BC    | 0.540  | 0.309  | 0.008  | 0.002   | 1.870  | 1.120  | 0.043  | 0.010  |
| CNE15             | BC    | 0.080  | 0.054  | <0.023 | <0.023  | 0.280  | 0.244  | <0.023 | <0.023 |
| CNE40             | BC    | 0.425  | 0.502  | 1.160  | 49.000  | 4.410  | 1.610  | 20.000 | >50    |
| CNE7              | BC    | 0.540  | 16.000 | 1.660  | 0.393   | 1.360  | >50    | 4.500  | 1.910  |
| 288.36            | C     | 0.103  | 0.167  | 0.971  | 0.005   | 0.379  | 0.897  | 0.368  | 0.018  |
| 288.38            | C     | 1.520  | 0.556  | 3.140  | 0.186   | 5.860  | 1.940  | >50    | >50    |
| 0013095-2.11      | C     | 0.142  | 0.181  | <0.023 | <0.023  | 0.519  | 0.396  | 0.061  | 0.148  |
| 001428-2.42       | C     | <0.023 | <0.023 | <0.023 | <0.023  | 0.035  | 0.034  | <0.023 | <0.023 |
| 25710-2.43        | C     | 0.545  | 0.517  | 0.038  | <0.023  | 1.560  | 2.000  | 0.179  | 0.120  |
| 25711-2.4         | C     | 0.712  | 0.578  | 1.500  | 0.037   | 1.700  | 1.440  | 5.270  | 0.573  |
| 25925-2.22        | C     | 0.559  | 0.408  | <0.023 | <0.023  | 1.390  | 1.040  | 0.063  | 0.025  |
| 26191-2.48        | C     | 0.195  | 0.219  | 0.142  | 1.950   | 0.646  | 0.699  | 0.956  | >50    |
| 3168.V4.C10       | C     | 0.131  | 0.163  | 0.162  | 0.037   | 0.279  | 0.350  | 0.657  | 0.515  |
| 6644.V2.C33       | C     | 0.164  | 0.398  | 0.033  | 35.300  | 0.528  | 2.360  | 0.120  | >50    |
| 6785.V5.C14       | C     | 0.332  | 0.219  | <0.023 | <0.023  | 0.869  | 0.632  | 0.094  | <0.023 |
| BR025.9           | C     | 0.271  | 19.800 | 0.044  | 0.009   | 1.080  | >50    | 0.215  | 0.049  |
| CAP244.D3         | C     | 0.857  | 0.338  | 0.088  | <0.023  | 2.360  | 0.838  | 0.362  | 0.058  |
| CAP45.G3          | C     | 2.290  | 46.100 | 0.003  | 0.002   | >50    | >50    | 0.014  | 0.007  |
| CNE31             | C     | 0.962  | 0.336  | 13.500 | 2.510   | 2.240  | 1.330  | >50    | >50    |
| CNE58             | C     | 0.124  | 0.738  | <0.023 | <0.023  | 0.313  | 2.620  | 0.068  | <0.023 |
| DU151.2           | C     | 3.160  | 0.370  | 0.012  | 0.004   | 46.500 | 0.099  | 0.054  | 0.016  |
| DU156.12          | C     | 0.082  | <0.023 | <0.023 | <0.023  | 0.244  | 0.099  | 0.143  | 0.019  |
| MW965.26          | C     | 0.038  | 0.034  | 1.990  | 0.961   | 0.116  | 0.110  | 49.900 | >50    |
| SO18.18           | C     | 0.071  | 0.099  | 0.061  | 0.023   | 0.166  | 0.237  | 0.227  | 0.136  |
| TZBD.02           | C     | 0.072  | 0.089  | 0.265  | 0.025   | 0.228  | 0.331  | 1.299  | 0.178  |
| ZM012.29          | C     | 0.250  | 0.165  | 27.000 | 0.931   | 0.828  | 0.623  | >50    | >50    |
| ZM108.10          | C     | 0.556  | 0.421  | 0.097  | 0.042   | 1.370  | 0.195  | 1.390  | 2.558  |
| ZM108.9           | C     | 0.248  | 0.135  | 0.635  | 1.100   | 0.058  | 0.394  | 6.580  | >50    |
| ZM109.32          | C     | 0.091  | 0.190  | 0.099  | 30.000  | 0.422  | 0.055  | 0.722  | >50    |
| ZM109.4           | C     | 0.134  | <0.023 | 0.106  | 4.930   | 0.394  | 0.108  | 2.640  | >50    |
| ZM146.7           | C     | 0.460  | 0.971  | 0.635  | 0.767   | 1.620  | 4.910  | 6.780  | >50    |
| ZM176.66          | C     | 0.038  | 0.103  | 0.007  | 0.002   | 0.246  | 10.900 | 0.050  | 0.010  |
| ZM181.6           | C     | 1.120  | 11.600 | 0.005  | 0.001   | 6.490  | >50    | 0.013  | 0.054  |

|              |   |       |        |        |        |        |       |        |        |
|--------------|---|-------|--------|--------|--------|--------|-------|--------|--------|
| ZM197.7      | C | 0.624 | 0.830  | 0.414  | 0.650  | 1.550  | 4.520 | 1.920  | 6.670  |
| ZM233.6      | C | 4.250 | 39.700 | <0.023 | <0.023 | 23.100 | >50   | 0.016  | 0.004  |
| ZM249.1      | C | 0.082 | 0.029  | 0.033  | 0.073  | 0.242  | 0.116 | 0.408  | 9.230  |
| ZM53.12      | C | 1.310 | 4.280  | 0.092  | 0.009  | 4.020  | 1.150 | 0.330  | 0.031  |
| ZM53.21      | C | 1.160 | 2.650  | 0.019  | 0.003  | 3.590  | 9.780 | 0.071  | 0.009  |
| ZM55.4a      | C | 0.450 | 1.530  | 4.190  | 0.308  | 1.500  | 0.457 | 41.200 | 14.500 |
| Z31965.c1    | D | 0.487 | 0.213  | 1.510  | 4.720  | 1.550  | 0.848 | >50    | >50    |
| P0402.c2.11  | G | 0.210 | nd     | 0.296  | 0.025  | 0.590  | nd    | 2.367  | 0.411  |
| P1981.C5.3   | G | 0.460 | nd     | 0.259  | 0.376  | 1.260  | nd    | 2.512  | >50    |
| X1193.c1     | G | 0.110 | nd     | 0.105  | 0.018  | 0.320  | nd    | 0.304  | 0.110  |
| X1254.c3     | G | 0.070 | nd     | 0.085  | 0.023  | 0.190  | nd    | 0.304  | 0.219  |
| X1632.S2.B10 | G | 0.120 | nd     | 0.107  | 0.012  | 0.740  | nd    | 0.934  | 0.076  |
| X2131.C1.B5  | G | 0.510 | nd     | 0.084  | 0.024  | 1.540  | nd    | 0.286  | 0.139  |

#### Resistant Viruses

| Virus            | Clade | IC50   |         |         |         | IC80   |         |        |        |
|------------------|-------|--------|---------|---------|---------|--------|---------|--------|--------|
|                  |       | VRC01  | VRCPG04 | PG9     | PG16    | VRC01  | VRCPG04 | PG9    | PG16   |
| 266-60           | AG    | 0.353  | 0.346   | 24.018  | >50     | 1.351  | 1.208   | >50    | >50    |
| 6535.3           | B     | 2.160  | 0.840   | 0.465   | >50     | 6.270  | 3.890   | 2.310  | >50    |
| 1006-11.C3.1601  | B     | 0.150  | nd      | 0.386   | >50     | 0.390  | nd      | 1.906  | >50    |
| 6240.08.TA5.4622 | B     | 0.610  | nd      | 1.747   | >50     | 1.820  | nd      | 6.333  | >50    |
| HXB2_DG          | B     | 0.040  | 0.064   | 0.553   | >50     | 0.077  | 0.104   | 10.200 | >50    |
| CNE53            | C     | 0.108  | 0.108   | 0.147   | >50     | 0.280  | 0.274   | 0.809  | >50    |
| ZM215.8          | C     | 0.276  | 0.118   | <0.023  | >50     | 0.833  | 0.458   | 0.228  | >50    |
| ZM55.28a         | C     | 0.144  | 0.267   | 0.571   | >50     | 0.532  | 1.560   | 11.500 | >50    |
| 3016.v5.c45      | D     | 0.111  | 20.800  | 0.286   | >50     | 0.341  | >50     | >50    | >50    |
| UG024.2          | D     | 0.106  | 0.114   | 3.940   | >50     | 0.536  | 0.888   | >50    | >50    |
| 251-18           | AG    | 3.580  | 1.220   | >50     | 10.500  | 10.200 | 4.210   | >50    | >50    |
| RHPA.7           | B     | 0.047  | 0.048   | >50     | 1.320   | 0.155  | 0.148   | >50    | >50    |
| 3873.V1.C24      | C     | 0.954  | 0.203   | >50     | 12.200  | 0.328  | 1.210   | >50    | >50    |
| 6952.v1.c20      | CD    | 0.040  | nd      | >50     | 21.865  | 0.120  | nd      | >50    | >50    |
| 3718.v3.c11      | A     | 0.218  | >50     | 0.050   | 0.019   | 4.990  | >50     | 0.202  | 0.102  |
| Q259.17          | A     | 0.051  | >50     | 0.045   | 0.028   | 0.262  | >50     | 0.229  | 0.717  |
| 3589.V1.C4       | AC    | 0.073  | >50     | 0.025   | 0.728   | 0.184  | >50     | 0.102  | 37.800 |
| C3347.c11        | AE    | 0.037  | >50     | 0.038   | 0.006   | 0.198  | >50     | 0.168  | 0.031  |
| CNE3             | AE    | 3.560  | >50     | 0.079   | 0.173   | >50    | >50     | 1.120  | >50    |
| 269-12           | AG    | 0.163  | >50     | 1.520   | 0.281   | 0.404  | >50     | 5.730  | 1.440  |
| AC10.29          | B     | 1.430  | >50     | 0.078   | <0.023  | 3.830  | >50     | 0.306  | 0.088  |
| THRO.18          | B     | 4.420  | >50     | 15.000  | 0.975   | 15.100 | >50     | >50    | >50    |
| 0077.V1.C16      | C     | 1.040  | >50     | 0.091   | <0.023  | 3.650  | >50     | 0.343  | 0.075  |
| 16055-2.3        | C     | 0.105  | >50     | 0.014   | 0.005   | 0.365  | >50     | 0.060  | 0.016  |
| 16845-2.22       | C     | 2.410  | >50     | 2.380   | 27.800  | 9.070  | >50     | 36.800 | >50    |
| Du123.6          | C     | 18.200 | >50     | 0.047   | 0.018   | >50    | >50     | 0.247  | 0.168  |
| 3326.V4.C3       | CD    | 0.073  | >50     | <0.023  | <0.023  | 15.200 | >50     | 0.111  | 0.221  |
| DU172.17         | C     | >50    | 0.218   | 0.262   | 0.030   | >50    | 1.160   | 0.899  | 0.134  |
| 3817.v2.c59      | CD    | >50    | 3.760   | 0.007   | 0.005   | >50    | 41.000  | 0.008  | 0.051  |
| 0439.v5.c1       | A     | 0.052  | 0.104   | >50     | >50     | 0.238  | 0.499   | >50    | >50    |
| 398-F1.F8.20     | A     | 0.058  | 0.016   | >50     | >50     | 0.520  | 0.124   | >50    | >50    |
| QH209.14M.A2     | A     | 0.024  | 0.037   | >50     | >50     | 0.078  | 0.247   | >50    | >50    |
| 0815.V3.C3       | ACD   | 0.036  | 0.073   | >50     | >50     | 0.024  | 0.204   | >50    | >50    |
| CNE56            | AE    | 0.442  | 0.574   | >50     | >50     | 1.690  | 2.320   | >50    | >50    |
| TH976.17         | AE    | 0.066  | 0.024   | >50     | >50     | 0.444  | 0.151   | >50    | >50    |
| 1054-07.TC4.1499 | B     | 0.710  | nd      | >50     | >50     | 2.850  | nd      | >50    | >50    |
| 6101.10          | B     | 0.108  | 0.090   | >50     | >50     | 0.330  | 0.528   | >50    | >50    |
| 62357.14.D3.4589 | B     | 0.960  | nd      | >50     | >50     | 4.680  | nd      | >50    | >50    |
| 6244.13.B5.4567  | B     | 0.210  | nd      | >50     | >50     | 0.530  | nd      | >50    | >50    |
| 89.6.DG          | B     | 0.460  | 0.130   | >50     | >50     | 1.575  | 0.331   | >50    | >50    |
| BG1168.01        | B     | 0.449  | 1.050   | >50     | >50     | 1.430  | 3.110   | >50    | >50    |
| BR07.DG          | B     | 1.666  | 1.038   | >50     | >50     | 4.672  | 6.379   | >50    | >50    |
| CNE12            | B     | 0.785  | 0.268   | >50     | >50     | 2.190  | 0.938   | >50    | >50    |
| CNE4             | B     | 0.871  | 0.618   | >50     | >50     | 2.360  | 1.930   | >50    | >50    |
| CNE57            | B     | 0.535  | 0.126   | >50     | >50     | 1.340  | 0.316   | >50    | >50    |
| JRFL JB          | B     | 0.033  | 0.102   | >50     | >50     | 0.117  | 0.465   | >50    | >50    |
| QH0515.01        | B     | 0.623  | 0.619   | >50     | >50     | 3.660  | 4.210   | >50    | >50    |
| QH0892.42        | B     | 1.160  | 0.987   | >50     | >50     | 3.000  | 4.300   | >50    | >50    |
| RZ               | B     | 0.251  | 0.226   | >50     | >50     | 1.470  | 1.180   | >50    | >50    |
| SF162.LS         | B     | 0.237  | 0.089   | >50     | >50     | 0.627  | 0.249   | >50    | >50    |
| 16936-2.21       | C     | 0.109  | 0.071   | >50     | >50     | 0.466  | 0.228   | >50    | >50    |
| 96ZM651.02       | C     | 0.525  | 2.950   | >50     | >50     | 1.940  | 16.000  | >50    | >50    |
| CNE30            | C     | 0.927  | 0.626   | >50     | >50     | 2.590  | 2.510   | >50    | >50    |
| ZM214.15         | C     | 0.881  | 0.411   | >50     | >50     | 3.040  | 3.200   | >50    | >50    |
| 3337.V2.C6       | CD    | 0.063  | 0.044   | >50     | >50     | 0.133  | 0.076   | >50    | >50    |
| 6405.v4.c34      | D     | 2.630  | 2.790   | >50     | >50     | 7.360  | 7.370   | >50    | >50    |
| A03349M1.vrc4a   | D     | 4.660  | 3.500   | >50     | >50     | 28.100 | 14.600  | >50    | >50    |
| NKU3006.ec1      | D     | 0.506  | 0.414   | >50     | >50     | 1.780  | 1.650   | >50    | >50    |
| 00836-2.5        | C     | 0.128  | >50     | 49.000  | >50     | 0.520  | >50     | >50    | >50    |
| 247-23           | D     | 24.200 | >50     | 0.195   | >50     | >50    | >50     | 0.909  | >50    |
| 6545.V4.C1       | AC    | >50    | >50     | 0.095   | 0.068   | >50    | >50     | 0.315  | 0.562  |
| TV1.29           | C     | >50    | >50     | 0.008   | 0.002   | >50    | >50     | 0.044  | 0.150  |
| HO86.8           | B     | >50    | >50     | 0.014   | 0.001   | >50    | >50     | 0.125  | 0.020  |
| 242-14           | AG    | >50    | >50     | 0.025   | <0.023  | >50    | >50     | 0.112  | 0.175  |
| 6540.v4.c1       | AC    | >50    | >50     | 0.035   | 0.017   | >50    | >50     | 0.213  | 0.154  |
| CAP210.E8        | C     | >50    | >50     | 0.080   | 0.021   | >50    | >50     | 0.501  | 0.882  |
| 57128.vrc15      | D     | >50    | >50     | 0.104   | 0.162   | >50    | >50     | 0.665  | >50    |
| 57128.02         | D     | >50    | >50     | 0.136   | 0.076   | >50    | >50     | 0.634  | 38.300 |
| TZA125.17        | C     | >50    | >50     | 0.231   | 0.024   | >50    | >50     | 1.210  | 0.779  |
| DU422.01         | C     | >50    | >50     | 0.303   | <0.023  | >50    | >50     | 6.060  | 49.900 |
| 278-50           | AG    | >50    | >50     | 0.813   | 1.130   | >50    | >50     | 9.901  | 0.001  |
| 250-4            | AG    | >50    | >50     | <0.0006 | <0.0006 | >50    | >50     | 9.901  | 0.001  |
| 7165.18          | B     | >50    | >50     | >50     | 3.100   | >50    | >50     | >50    | >50    |
| 620345.c1        | AE    | >50    | >50     | 0.393   | >50     | >50    | >50     | >50    | >50    |
| CNE14            | B     | 0.389  | >50     | >50     | >50     | 0.973  | >50     | >50    | >50    |
| MN.3             | B     | 0.033  | >50     | >50     | >50     | 0.070  | >50     | >50    | >50    |
| 3637.V5.C3       | C     | 4.090  | >50     | >50     | >50     | 11.000 | >50     | >50    | >50    |
| ZM135.10a        | C     | 1.280  | >50     | >51     | >50     | 6.160  | >50     | >50    | >50    |
| ZM135.8a         | C     | 0.374  | >50     | >52     | >50     | 2.050  | >50     | >50    | >50    |
| UG021.16         | D     | 0.296  | >50     | >53     | >50     | 0.920  | >50     | >50    | >50    |
| BL01.DG          | B     | >50    | >50     | >50     | >50     | >50    | >50     | >50    | >50    |
| 6322.V4.C1       | C     | >50    | >50     | >50     | >50     | >50    | >50     | >50    | >50    |
| 6471.V1.C16      | C     | >50    | >50     | >50     | >50     | >50    | >50     | >50    | >50    |
| 6631.V3.C10      | C     | >50    | >50     | >50     | >50     | >50    | >50     | >50    | >50    |
| X2088.c9         | G     | >50    | >50     | >50     | >50     | >50    | >50     | >50    | >50    |

**Figure S1. IC<sub>50</sub> and IC<sub>80</sub> neutralization values for 208 HIV-1 isolates and four mAb.** Red boxes indicate values < 1 µg/ml, orange, 1-10 µg/ml, and yellow, 10-50 µg/ml; nd, not done. Isolates in the "Sensitive" table are neutralized by all 4 mAbs at an IC<sub>50</sub> <50 µg/ml.
